# Supplementary material
Source: Royal Society of Chemistry journal article supplement (doi:10.1039/d6cp01042c)
Supplement: d6cp01042c1.pdf [file d6cp01042c1.pdf]

## Supplementary Information (SI)

### Impact-Induced Hotspot Formation and Sensitivity Ranking in Energetic Crystals Revealed by Deep Potential Molecular Dynamics

Wenjuan Li, Mingjie Wen, Jiahe Han, Qingzhao Chu, Dongping Chen\*

*State Key Laboratory of Explosion Science and Safety Protection, Beijing Institute of Technology, Beijing 100081, P. R. China*

In the supplementary materials, we present:

1. `Explicit_atomic_impactor_impact.in`
2. **Figure S1** EOS curves for the eight EMs studied in this work.
3. **Figure S2** Total normalized energy drift curves during the impact simulations under NVE conditions.
4. **Figure S3** Spatial distributions of stress (a) and temperature (b) in the larger simulation cell ( $5\text{ nm} \times 5\text{ nm} \times 12\text{ nm}$ ) under an impact velocity of  $700\text{ m s}^{-1}$ .
5. **Figure S4** Evolution of (a) sample temperature, (b) strain, (c) decomposition ratio, and (d) stress between Size 1 ( $5\text{ nm} \times 5\text{ nm} \times 6\text{ nm}$ ) and Size 2 ( $5\text{ nm} \times 5\text{ nm} \times 12\text{ nm}$ ) under an impact velocity of  $700\text{ m s}^{-1}$ .
6. **Figure S5** Evolution of (a) sample temperature, (b) strain, (c) decomposition ratio, and (d) stress between the porous aggregate model consisting of eight 2-nm RDX nanoparticles (Model 1,  $2\text{ nm} \times 8$ ) and the single-crystal model (Model 2,  $5\text{ nm} \times 5\text{ nm} \times 6\text{ nm}$ ) under an impact velocity of  $700\text{ m s}^{-1}$ .
7. **Figure S6** Spatial distributions of (a) stress and (b) temperature in the porous aggregate model composed of eight 2-nm RDX nanoparticles (Model 1,  $5\text{ nm} \times 5\text{ nm} \times 5\text{ nm}$ ) under an impact velocity of  $700\text{ m s}^{-1}$ .

---

\* Corresponding author: E-mail: dc516@bit.edu.cn (D. Chen)

8. **Figure S7** Structured temperature maps for HMX and TATB.
9. **Figure S8** Products evolution of RDX under different impact velocities.
10. **Figure S9** Fitting of the relationship between the final decomposition fraction and impact velocity using Logistic, Hill, and Weibull functions.
11. **Figure S10** Decomposition fraction evolutions and critical velocity fittings of CL-20.
12. **Figure S11** Decomposition fraction evolutions and critical velocity fittings of HMX.
13. **Figure S12** Decomposition fraction evolutions and critical velocity fittings of PETN.
14. **Figure S13** Decomposition fraction evolutions and critical velocity fittings of BTMNA.
15. **Figure S14** Decomposition fraction evolutions and critical velocity fittings of NOB-3.
16. **Figure S15** Decomposition fraction evolutions and critical velocity fittings of TADP.
17. **Figure S16** Decomposition fraction evolutions and critical velocity fittings of TATB.
18. **Table S1** Experimental impact sensitivities ( $E_{50}$ ) and the corresponding critical impact velocities obtained from MD simulations for eight EMs.
19. **Figure S17** Correlation between simulation-derived critical impact velocity determined by 10% decomposition ratio and experimental impact sensitivity of EMs.
20. **Figure S18** Orientation dependence of RDX under an impact velocity of  $600 \text{ m s}^{-1}$ . Evolution of (a) Sample temperature, (b) strain, (c) decomposition ratio, and (d) the time and temperature corresponding to a decomposition ratio of 5% for the (001), (010), and (100) surfaces.
21. **Figure S19** Orientation dependence of TATB under an impact velocity of  $900 \text{ m s}^{-1}$ . Evolution of (a) Sample temperature, (b) strain, (c) decomposition ratio, and (d) the time and temperature corresponding to a decomposition ratio of 5% for the (001), (010), and (100) surfaces.

## 1. Explicit\_atomic\_impactor\_impact.in

```
# Usage: as explicit_atomic_impactor_impact.in and run with lmp
# ----- variables -----
variable fname          string  RDX_700ms
variable SPEED_mps     equal   -700.0          # m/s, negative -> towards -z
variable speed_Aps     equal   v_SPEED_mps*1.0e-2 # convert to Å/ps (metal)
variable dt            equal   0.0002
variable loadstep      equal   100000
# ----- system setup -----
units                  metal
dimension              3
boundary              p p fs          # periodic x,y; shrinkwrap/float z (open top)
atom_style             atomic
neighbor              2.0 bin
neighbor_modify       delay 0 every 1 check yes
# ----- read sample -----
read_data              RDX_impactor_co.data
group flyer id 7939:113946
group sample          subtract all flyer
fix wall_z sample wall/reflect zlo EDGE
pair_style deepmd CHNO-iter128-20240716-compress.pb
pair_coeff * *
# ----- thermo / timestep -----
timestep ${dt}
thermo 500
thermo_style custom step temp pe ke etotal press lx ly lz
# ----- minimization -----
min_style sd
minimize 1.0e-8 1.0e-10 1000 10000
```

```

reset_timestep 0
# ----- rigid -----
velocity sample create 300.0 12345 mom yes rot yes
fix fly_rigid flyer rigid/nve single force * off off on torque * off off off
velocity flyer set 0.0 0.0 ${speed_Aps} units box
fix sample_nve sample nve
# ----- computes for monitoring -----
compute zmax_sample sample reduce max z
compute zmin_sample sample reduce min z
run 0
variable zmax0 equal c_zmax_sample
variable zmin0 equal c_zmin_sample
variable Lz0 equal "v_zmax0 - v_zmin0"
variable time equal time
variable temp equal temp
compute sample_temp sample temp
variable sample_T equal c_sample_temp
variable pe equal pe
variable ke equal ke
variable etotal equal etotal
compute sample_pe sample pe/atom
compute sample_ke sample ke/atom
compute sample_pe_total sample reduce sum c_sample_pe
compute sample_ke_total sample reduce sum c_sample_ke
variable sample_PE equal c_sample_pe_total
variable sample_KE equal c_sample_ke_total
variable sample_Etotal equal "v_sample_PE + v_sample_KE"
compute          KE all ke/atom
variable          KB equal 8.625e-5

```

```

variable          TEMP atom c_KE/1.5/>{KB}
compute disp all displace/atom
compute l all centroid/stress/atom NULL
compute v all voronoi/atom
variable stressxx atom c_1[1]/c_v[1]/10000
variable stressyy atom c_1[2]/c_v[1]/10000
variable stresszz atom c_1[3]/c_v[1]/10000
variable stressxy atom c_1[1]/c_v[1]/10000
variable stressyz atom c_1[2]/c_v[1]/10000
variable stressxz atom c_1[3]/c_v[1]/10000
variable          sx equal "-pxx/10000"
variable          sy equal "-pyy/10000"
variable          sz equal "-pzz/10000"
variable          sxy equal "-pxy/10000"
variable          syz equal "-pyz/10000"
variable          sxz equal "-pxz/10000"
variable Lz0 equal {Lz0}
compute zmax_now sample reduce max z
variable depth equal "v_Lz0 - c_zmax_now"
variable strain equal "v_depth / v_Lz0"
compute zmin_flyer flyer reduce min z
variable com_flyer equal c_zmin_flyer
variable vel_fly_z equal vcm(flyer,z)
variable outfreq equal 500
fix out_all all print {outfreq}    "{time} {temp} {sample_T} {strain} {depth}
{vel_fly_z} {sx} {sy} {sz} {sxy} {syz} {sxz} {vonMises} {pe} {ke} {etotal}
{sample_PE} {sample_KE} {sample_Etotal}" file {fname}-impact-load.txt screen no
restart 50000 {fname}-impact-*.restart
dump traj all custom 500 {fname}-impact.dump id type element x y z vx vy vz fx fy fz

```

```

v_TEMP c_disp[*] v_stressxx v_stressyy v_stresszz v_stressxy v_stressxz v_stressyz
dump_modify traj element C H N O
dump traj_sample sample custom 100 ${fname}-impact_sample.dump id type element x y z
vx vy vz fx fy fz v_TEMP c_disp[*] v_stressxx v_stressyy v_stresszz v_stressxy v_stressxz
v_stressyz
dump_modify traj_sample element C H N O
run ${loadstep}

```

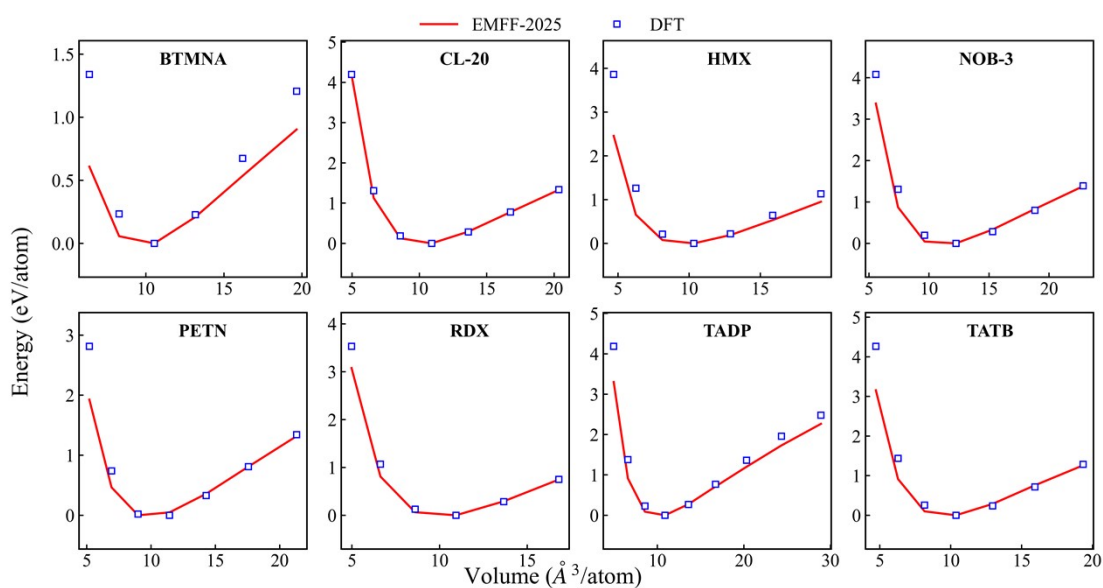

**Figure S1** EOS curves for the eight EMs studied in this work.

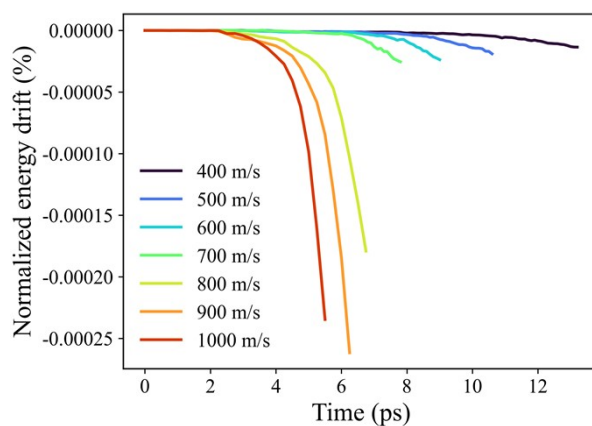

**Figure S2** Total normalized energy drift curves during the impact simulations under NVE conditions.

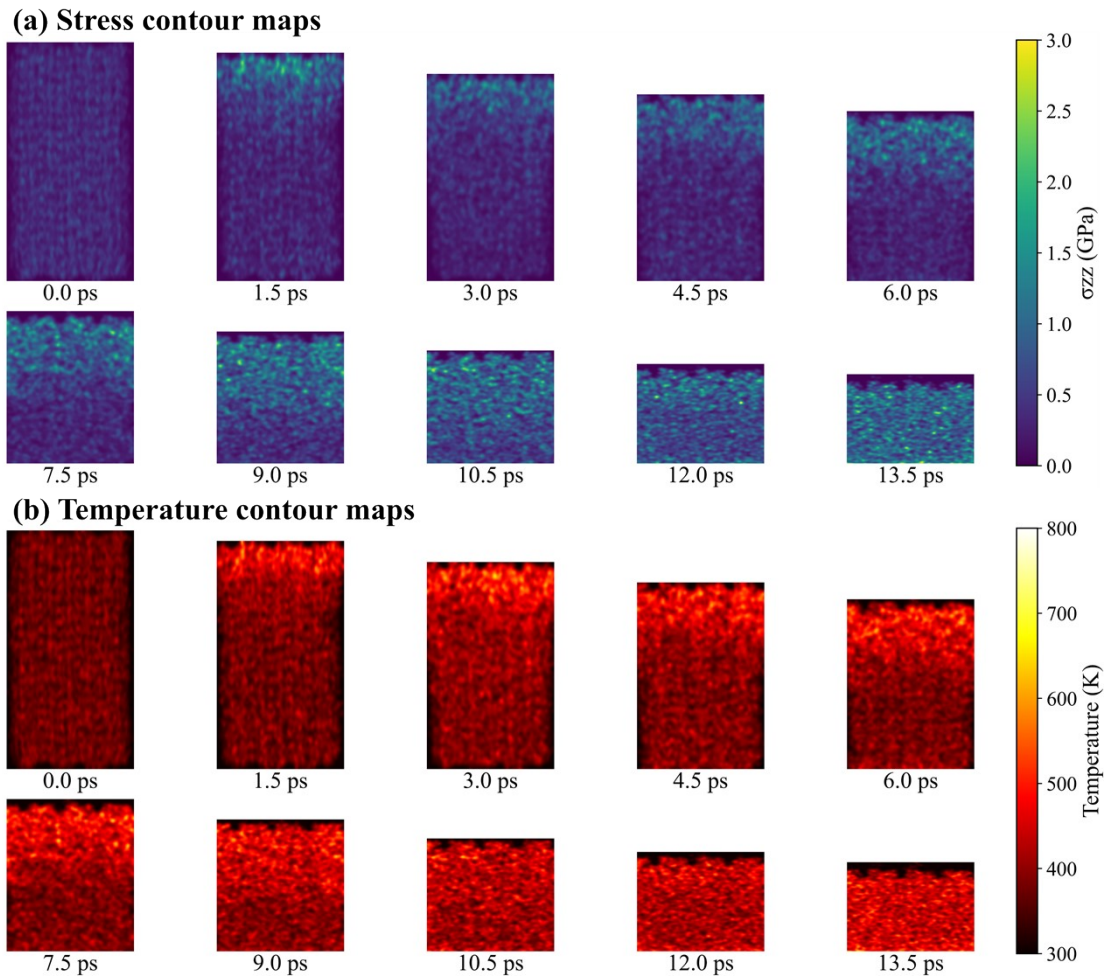

**Figure S3** Spatial distributions of stress (a) and temperature (b) in the larger simulation cell ( $5 \text{ nm} \times 5 \text{ nm} \times 12 \text{ nm}$ ) under an impact velocity of  $700 \text{ m s}^{-1}$ .

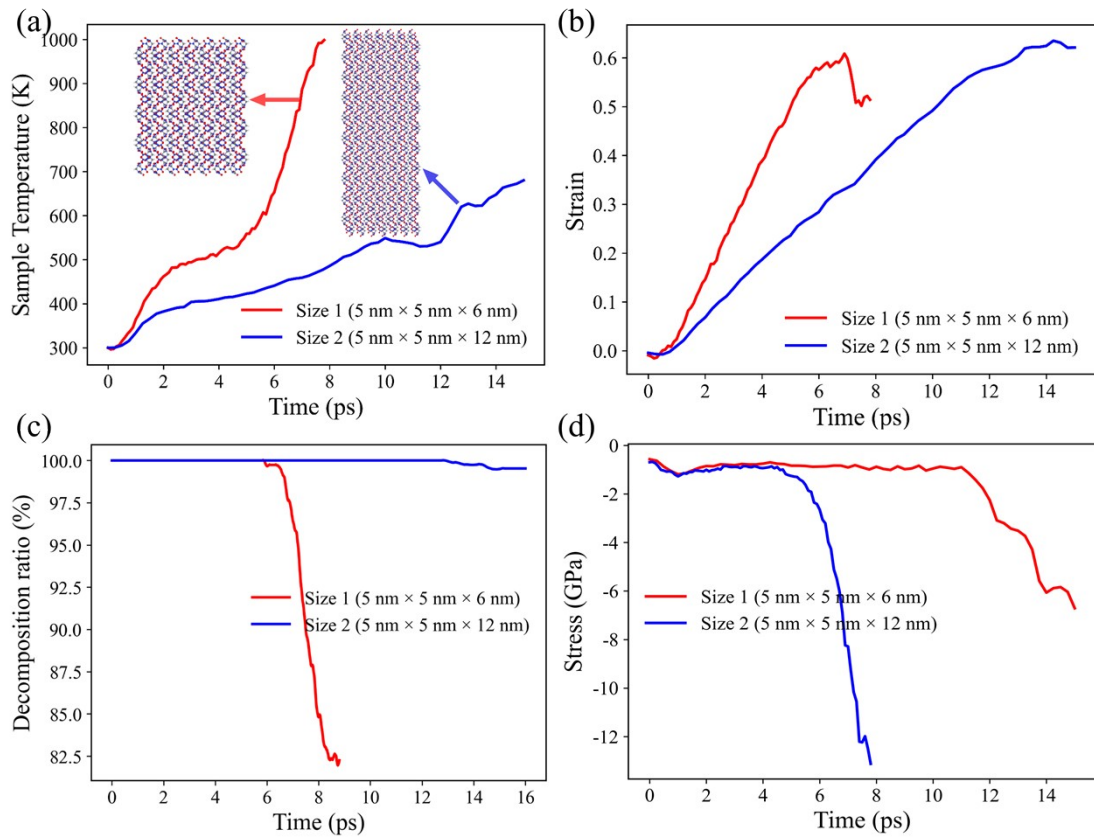

**Figure S4** Evolution of (a) sample temperature, (b) strain, (c) decomposition ratio, and (d) stress between Size 1 (5 nm × 5 nm × 6 nm) and Size 2 (5 nm × 5 nm × 12 nm) under an impact velocity of 700 m s<sup>-1</sup>.

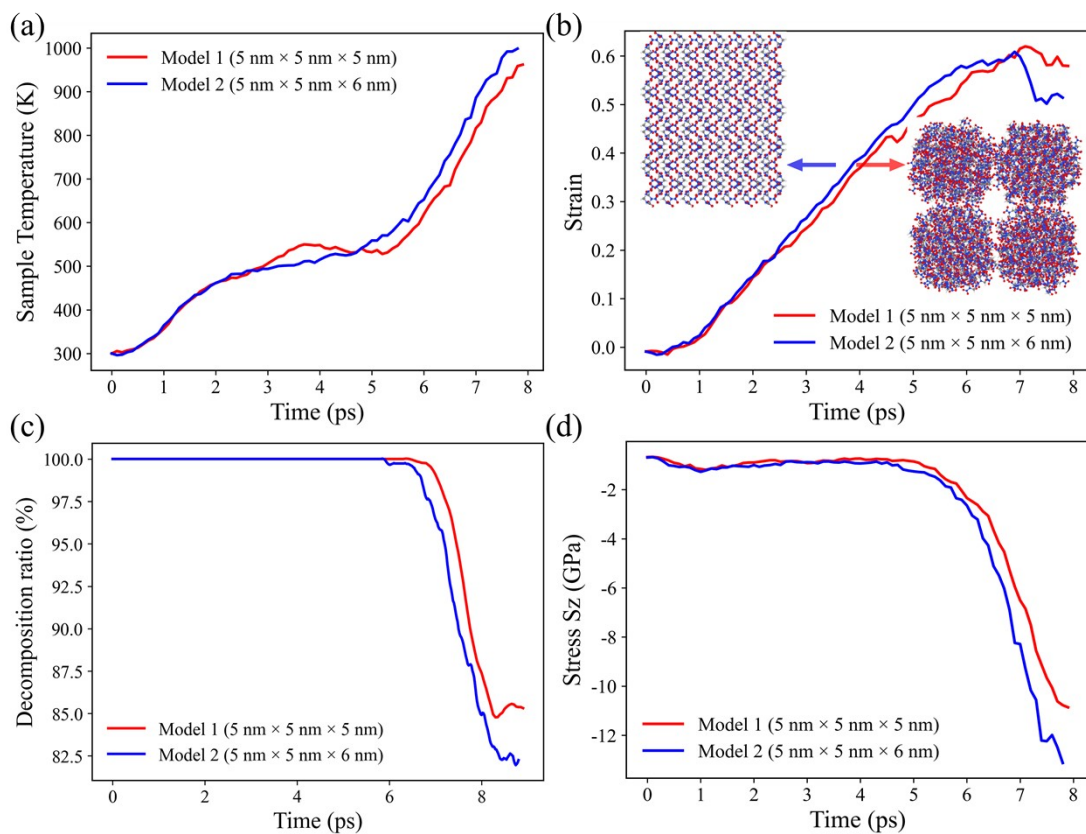

**Figure S5** Evolution of (a) sample temperature, (b) strain, (c) decomposition ratio, and (d) stress between the porous aggregate model consisting of eight 2-nm RDX nanoparticles (Model 1, 5 nm × 5 nm × 5 nm) and the single-crystal model (Model 2, 5 nm × 5 nm × 6 nm) under an impact velocity of 700 m s<sup>-1</sup>.

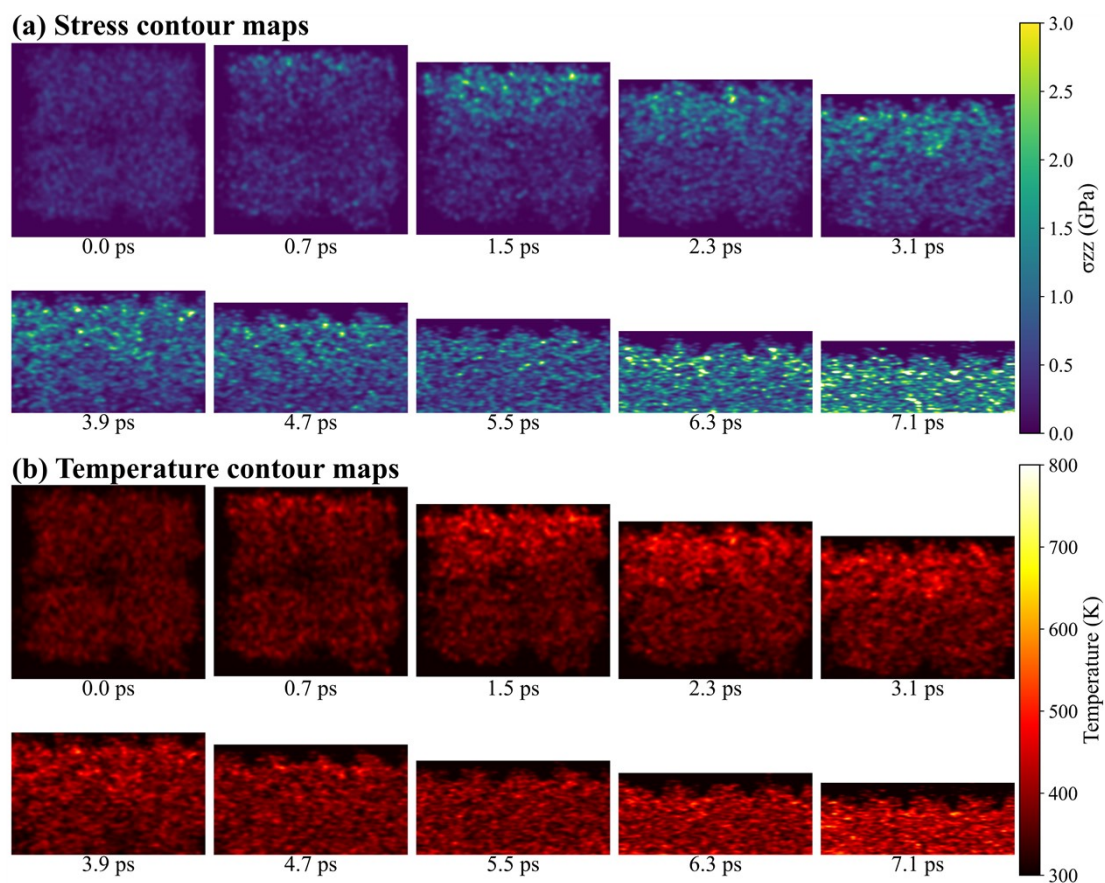

**Figure S6** Spatial distributions of (a) stress and (b) temperature in the porous aggregate model composed of eight 2-nm RDX nanoparticles (Model 1, 2 nm  $\times$  8) under an impact velocity of 700 m s<sup>-1</sup>.

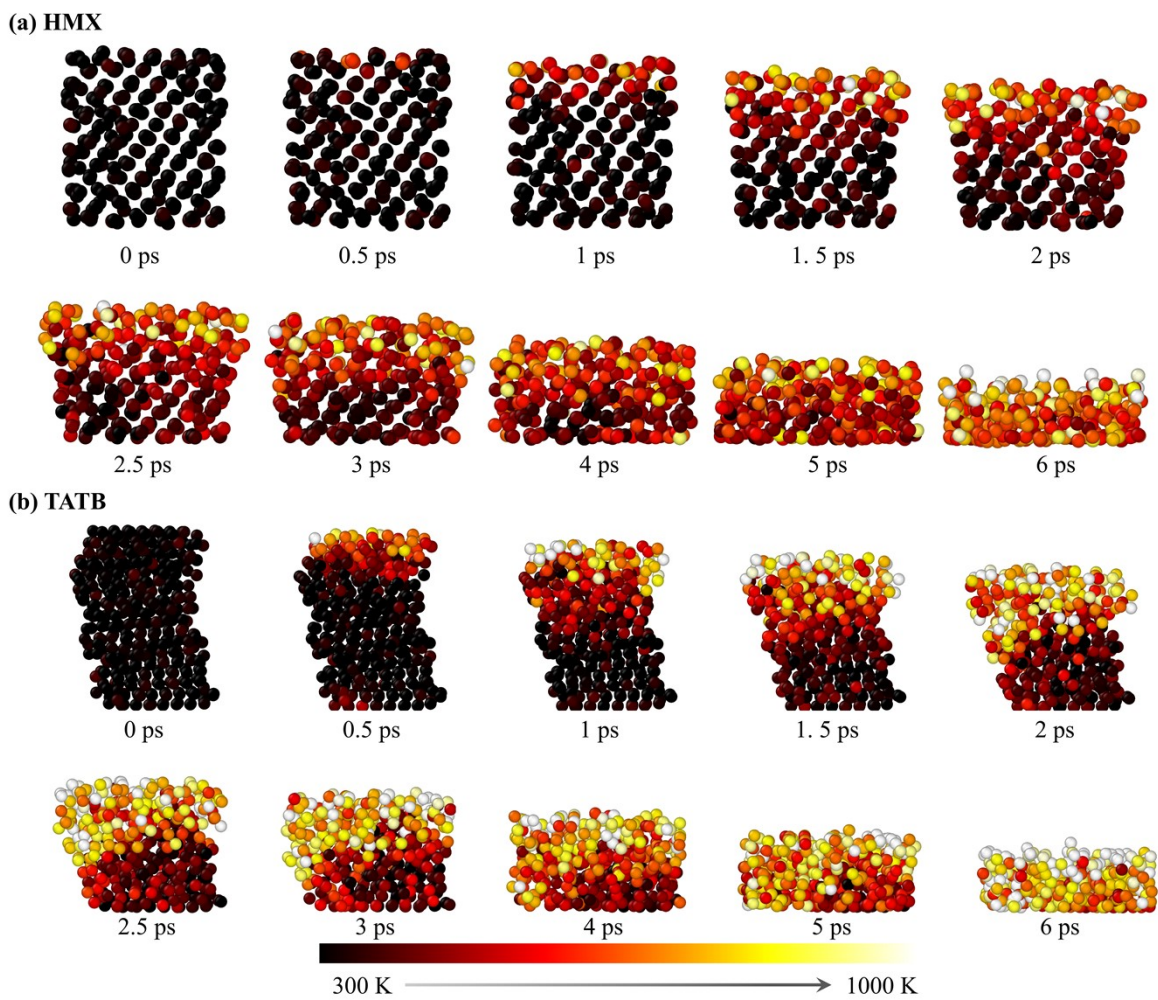

**Figure S7** Structured temperature maps for HMX and TATB.

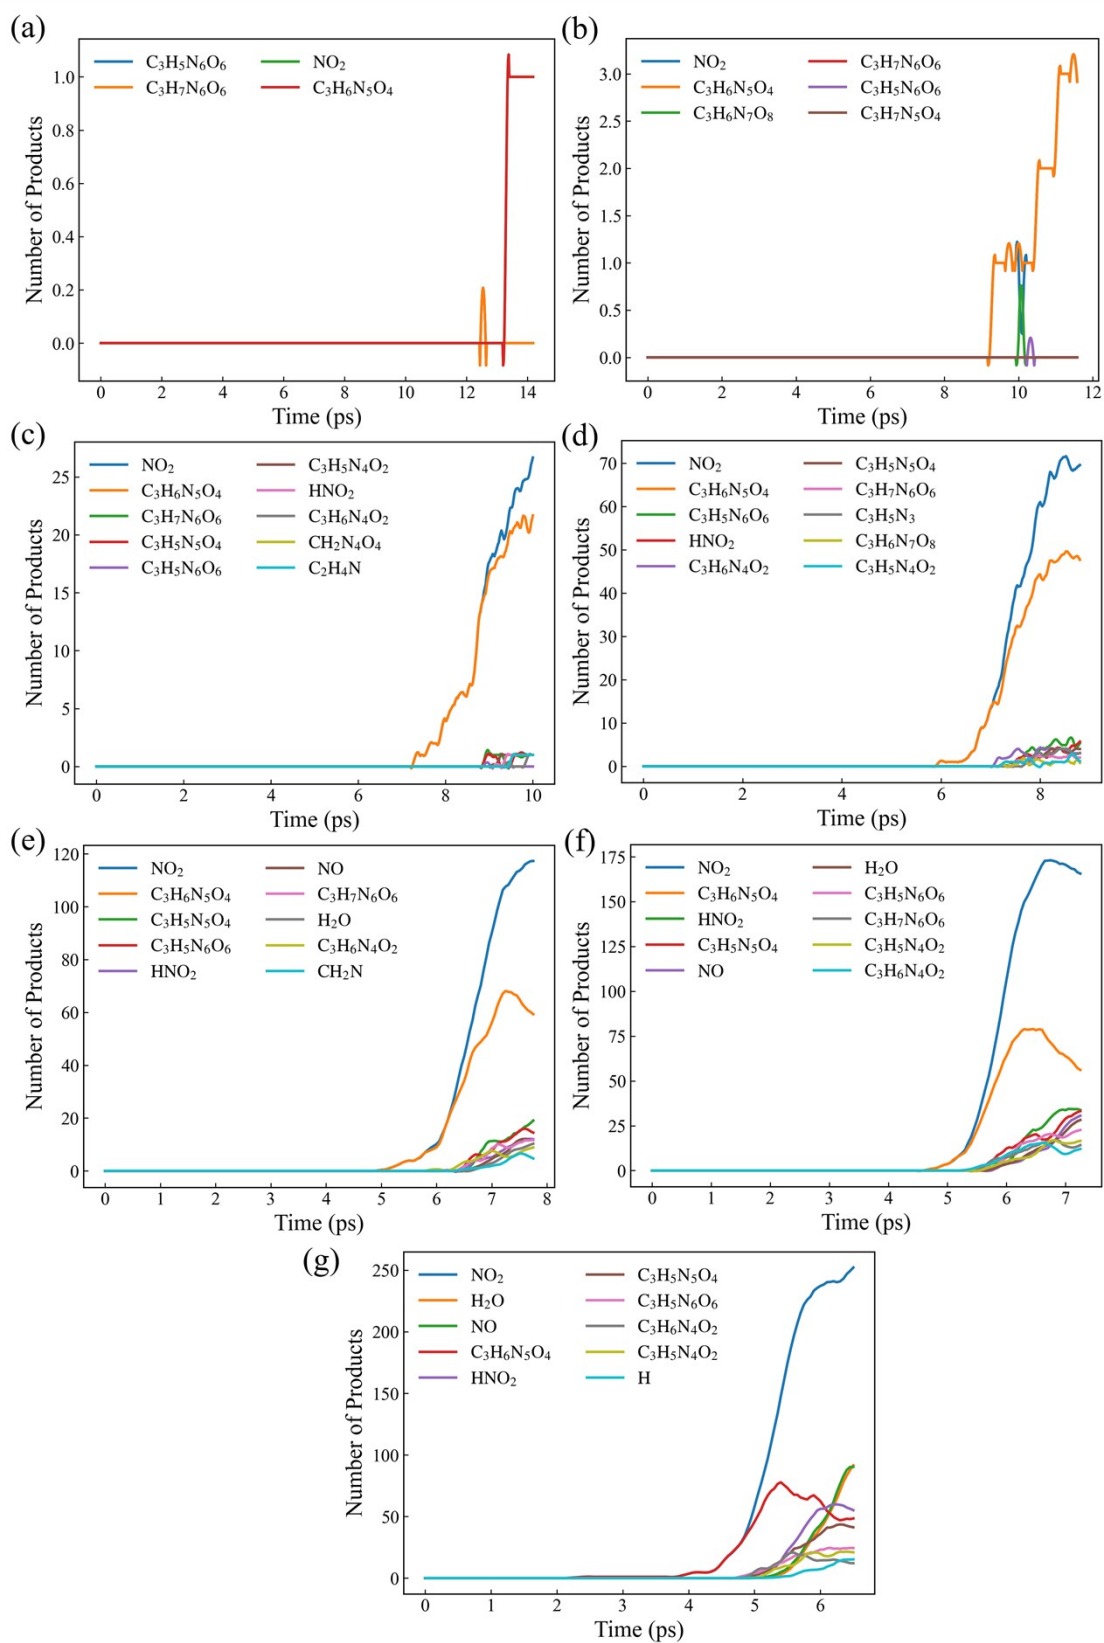

**Figure S8** Products evolution of RDX under different impact velocities. (a) 400 m/s, (b) 500 m/s, (c) 600 m/s, (d) 700 m/s, (e) 800 m/s, (f) 900 m/s, (g) 1000 m/s,

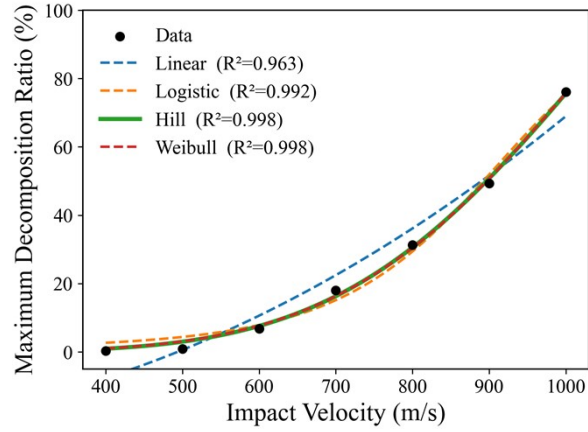

**Figure S9** Fitting of the relationship between the final decomposition fraction and impact velocity using Logistic, Hill, and Weibull functions.

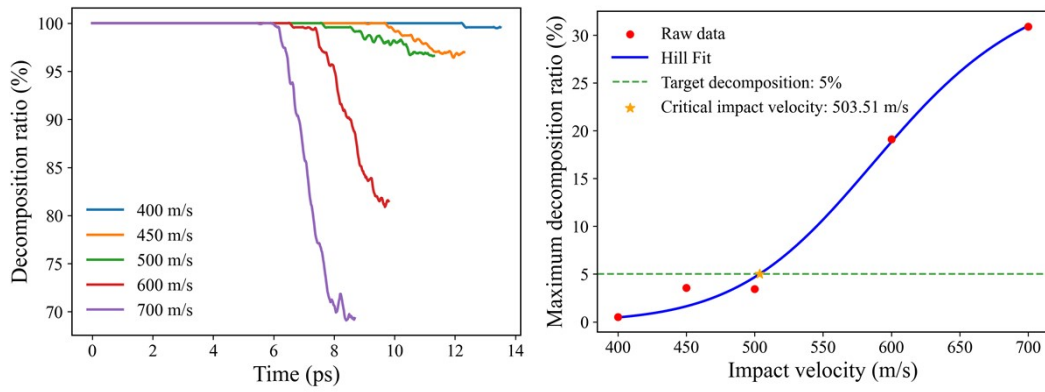

**Figure S10** Decomposition fraction evolutions and critical velocity fittings of CL-20.

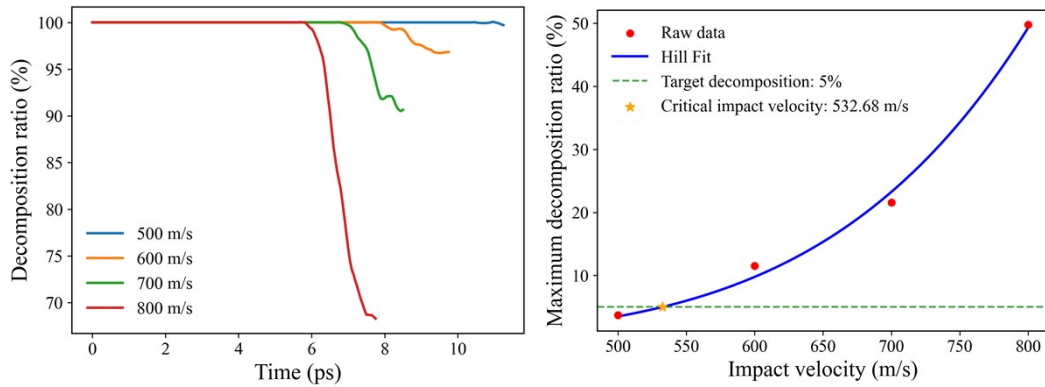

**Figure S11** Decomposition fraction evolutions and critical velocity fittings of HMX.

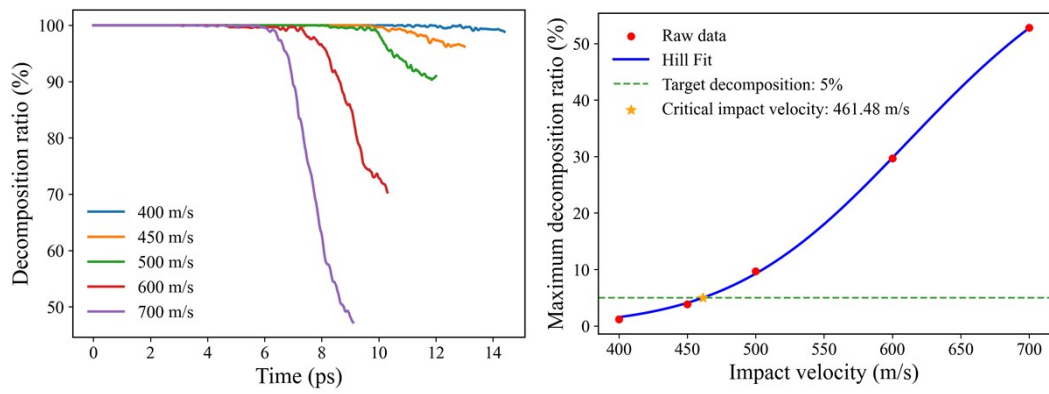

**Figure S12** Decomposition fraction evolutions and critical velocity fittings of PETN.

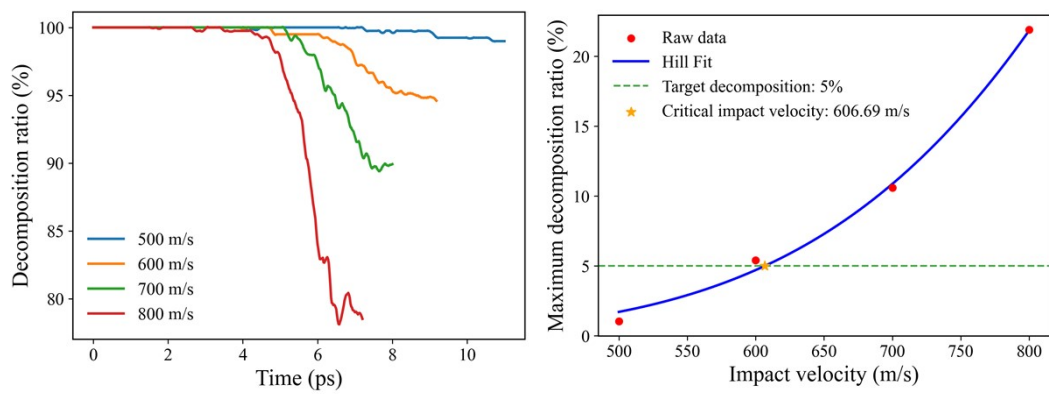

**Figure S13** Decomposition fraction evolutions and critical velocity fittings of BTMNA.

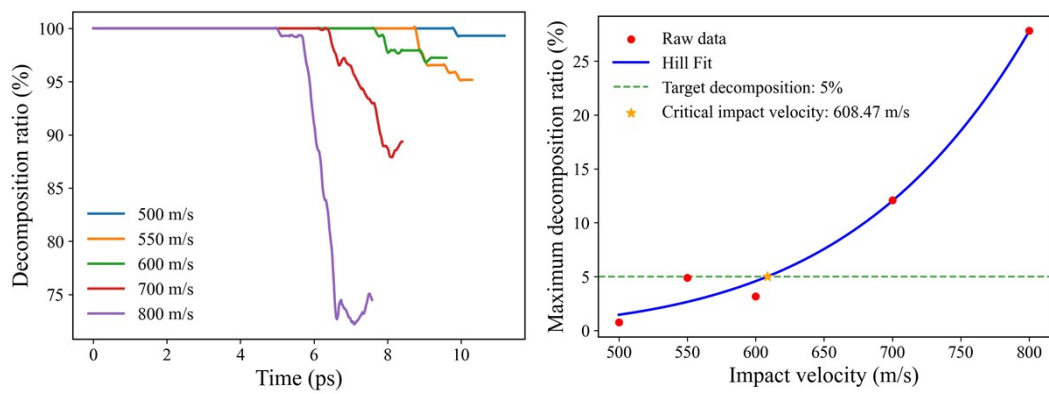

**Figure S14** Decomposition fraction evolutions and critical velocity fittings of NOB-3.

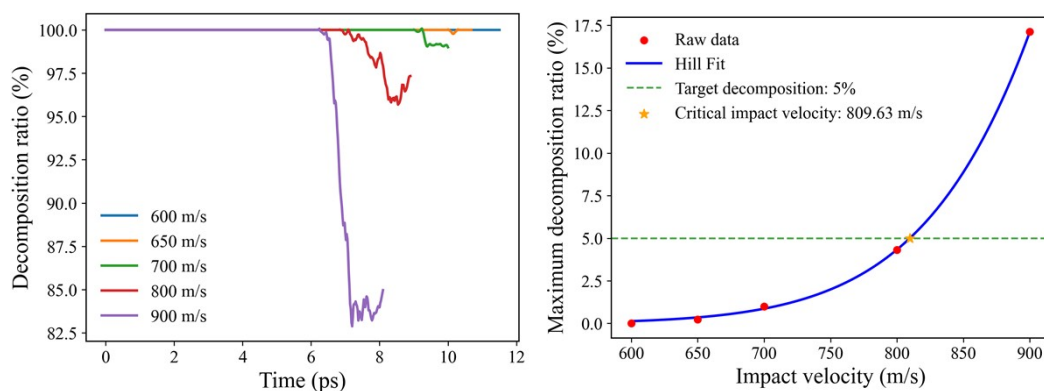

**Figure S15** Decomposition fraction evolutions and critical velocity fittings of TADP.

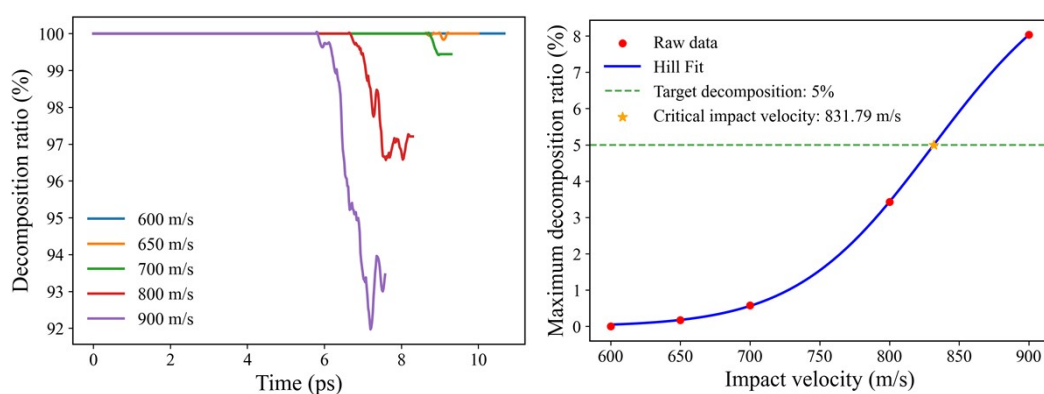

**Figure S16** Decomposition fraction evolutions and critical velocity fittings of TATB.

**Table S1** Experimental impact sensitivities ( $E_{50}$ ) and the corresponding critical impact velocities obtained from MD simulations for eight EMs.

| Material | Experimental impact sensitivity, $E_{50}$ (J) | Critical impact velocity (m/s) |
|----------|-----------------------------------------------|--------------------------------|
| PETN     | 3.5                                           | 461.48                         |
| CL-20    | 4.0                                           | 503.51                         |
| HMX      | 7.4                                           | 532.68                         |
| RDX      | 7.5                                           | 552.79                         |
| BTMNA    | 30.0                                          | 606.69                         |
| NOB-3    | 32.0                                          | 608.47                         |
| TADP     | >60.0                                         | 809.63                         |
| TATB     | 120.0                                         | 831.79                         |

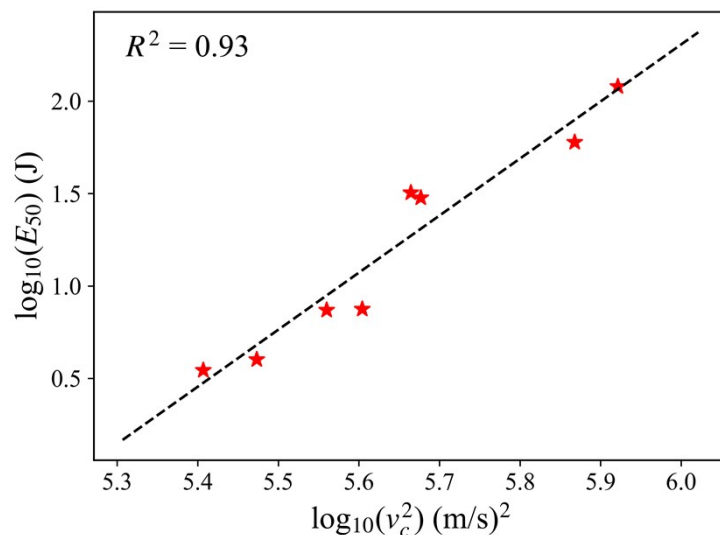

**Figure S17** Correlation between simulation-derived critical impact velocity determined by 10% decomposition ratio and experimental impact sensitivity of EMs.

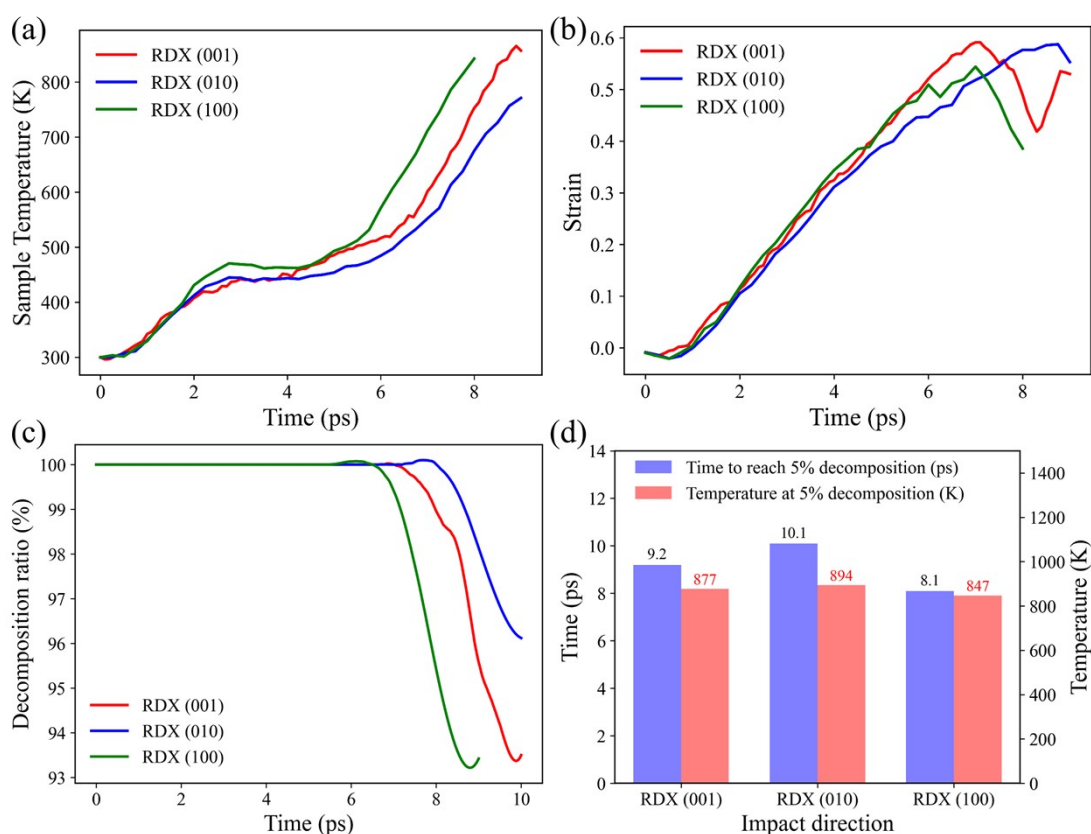

**Figure S18** Orientation dependence of RDX under an impact velocity of  $600 \text{ m s}^{-1}$ . Evolution of (a) Sample temperature, (b) strain, (c) decomposition ratio, and (d) the time and temperature corresponding to a decomposition ratio of 5% for the (001), (010), and (100) surfaces.

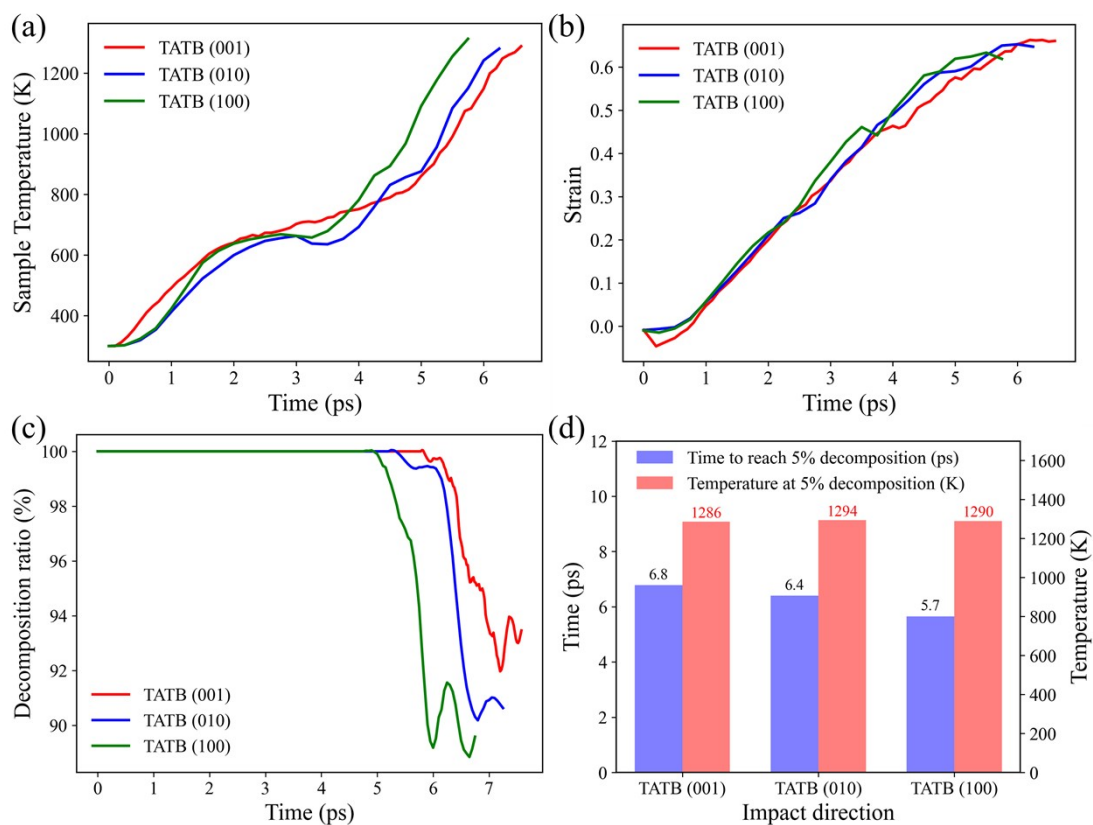

**Figure S19** Orientation dependence of TATB under an impact velocity of 900 m s<sup>-1</sup>. Evolution of (a) Sample temperature, (b) strain, (c) decomposition ratio, and (d) the time and temperature corresponding to a decomposition ratio of 5% for the (001), (010), and (100) surfaces.
